# Supplementary material for: The ChlD subunit links the motor and porphyrin binding subunits of magnesium chelatase
Source: PubMed Central journal article supplement (PMC6604950; doi:10.1042/bcj20190095), 2019-07-02
Supplement: BCJ-476-1875-s1.pdf [file BCJ-476-1875-s1.pdf]

| Strain                         | Description                                                                                  | Source                                            |
|--------------------------------|----------------------------------------------------------------------------------------------|---------------------------------------------------|
| WT                             | Glucose tolerant wild-type strain of <i>Synechocystis</i> sp. PCC 6803.                      | Dr Roman Sobotka, Centre Algatech, Czech Republic |
| FLAG-ChID                      | Gene encoding 3×FLAG tagged ChID expressed from <i>psbAII</i> promoter. Kanamycin resistant. | This study                                        |
| FLAG-ChID $\Delta$ <i>chID</i> | Native <i>chID</i> (slr1777) deleted from FLAG-ChID strain. Kanamycin and zeocin resistant.  | This study                                        |

**S1 Table. Strains of *Synechocystis* used in this study**

| Primer name | Sequence (5' to 3')                            |
|-------------|------------------------------------------------|
| AH47        | AAACGCCCTCTGTTTACCCA                           |
| AH48        | TCAACCCGGTACAGAGCTTC                           |
| AH282       | ATTTGGCGGCCGCAACCACCCTGACCCCTTTATTC            |
| AH283       | ACTAAAGATCTCTATTGCATGTCGGCGATCGCCTGG           |
| AH434       | TCAATGGCATCCAGTTTGAC                           |
| AH435       | ACATTAATTGCGTTGCGCTCACTGCGGAAATTGAGGGGAATAAAGG |
| AH436       | CAACTTAATCGCCTTGCAGCACATGACCAAGGTATTGCCTCCATG  |
| AH437       | AGACCAGTCTGAGGCTCTAGTCC                        |
| AH438       | CTGGGTTTCCAATTGATCCAGG                         |

**S2 Table. Primers used for generating *Synechocystis* FLAG-ChlD  $\Delta chlD$  strains used in this study.**

| <b>ChID variant</b> | <b>Forward Primer (5' to 3')</b>   | <b>Reverse Primer (5' to 3')</b>   |
|---------------------|------------------------------------|------------------------------------|
| D487E               | TTGTGTTTTTGGTGGAAAGCGTCGGGTTCCATGG | ATGGAACCCGACGCTTCCACCAAAAACAC      |
| S489A               | TTGGTGGATGCGGCGGGTTCATGG           | AACGCCATGGAACCCGCCGCATCCACC        |
| S491A               | ATGCGTCGGGTGCCATGGCGTTGAATCG       | ATTCAACGCCATGGCACCCGACGCATCC       |
| S554R               | TTGCCCTGTGGCGGTGGTCGCCCTTCC        | AAGCCGTGGGAAAGGGGACGACCACCGCCACAGG |

**S3 Table. Primers used for generating MIDAS site directed mutants of ChID used in this study.**

| Gel band            | Protein | $-(\log_{10} \text{p-value})$ | No. of peptide spectrum matches | Sequence coverage (%) |
|---------------------|---------|-------------------------------|---------------------------------|-----------------------|
| Upper (ca. 470 kDa) | ChIH    | 657                           | 547                             | 50.6                  |
|                     | ChID    | 456                           | 421                             | 57.4                  |
| Lower (ca. 370 kDa) | ChIH    | 1980                          | 1239                            | 80.8                  |
|                     | ChID    | 929                           | 745                             | 79.7                  |

**S4 Table. Analysis by mass spectrometry of native-PAGE gel bands corresponding to putative ChIH-ChID complexes.** Bands were excised and the proteins subjected to in-gel digestion with trypsin. Peptides were extracted and analysed by nanoLC-MS/MS. Protein components were identified by database searching as described in Experimental Procedures. The p-value is the probability that the protein identification is due to random events.

| Peptide in ChIH                                | Crosslinked site in ChIH | Peptide in ChID                                                                  | Crosslinked site in ChID | No. of peptide spectrum matches | Best 2-D PEP |
|------------------------------------------------|--------------------------|----------------------------------------------------------------------------------|--------------------------|---------------------------------|--------------|
| K.ENSSGAGFQDAMLK.L                             | E150                     | K.KR.L                                                                           | K543                     | 5                               | 3.2E-7       |
| R.LEAIAQR.A                                    | E432                     | K.KR.L                                                                           | K543                     | 1                               | 1.3E-3       |
| K.EFGNVFIGVQPTFGYEGDPMR.L                      | E581                     | K.KR.L                                                                           | K543                     | 1                               | 1.8E-9       |
| R.SASPHHGFAAYTYLNHIWKADAVLHFGT<br>HGSLEFMPGK.Q | D613                     | K.LVR <b>K</b> AGALIVFLVDASGSMALNR.M                                             | K477                     | 1                               | 2.7E-3       |
| R.NSDKGILAD <b>D</b> VELLQDITLATR.A            | D824                     | R.QVIVEQGD <b>I</b> R <b>G</b> KK.L                                              | K472                     | 1                               | 5.3E-7       |
| R.AENGGNYPETIASVLWGTDNIK.T                     | E978                     | K.KR.L                                                                           | K543                     | 1                               | 7.4E-4       |
| K.TADATFQNLDSSEISLTDVSHYFSDPTK.L               | D1156                    | R.G <b>K</b> K.L                                                                 | K472                     | 1                               | 1.6E-9       |
| K.TADATFQNL <b>D</b> SSEISLTDVSHYFSDPTK.L      | D1163                    | K.KR.L                                                                           | K543                     | 1                               | 1.0E-12      |
| K.APAAYIADTTTANAQVR.T                          | D1200                    | K.GK.V                                                                           | K433                     | 4                               | 2.0E-8       |
| K.WYEGMLSHGYEGVR.E                             | E1230                    | K.KFVSTG <b>F</b> GK.E                                                           | K635                     | 2                               | 2.7E-7       |
| R.LVNTMGWSATAGAV <b>D</b> NWVYEDANSTFIK<br>.D  | D1261                    | R.QAVELVIVPRSVLMDNPPPEQAPPPPPP<br>Q <b>N</b> QDE <b>G</b> KDEQEDQ <b>Q</b> DDK.E | K353                     | 1                               | 4.0E-6       |

**S5 Table. XL-MS of a putative ChIH-ChID complex using 1-ethyl-3-(3-dimethylamnopropyl)carbodiimide-HCl (EDC).** These results were generated as in S2 Table. Crosslinked residues are highlighted in bold within the peptide sequences. 2-Dimensional posterior error probability (2-D PEP) is the probability that a peptide spectrum match is a random event.

| ChID MIDAS Mutant | $T_m / ^\circ\text{C}$ |
|-------------------|------------------------|
| WT                | 50                     |
| D487E             | 47                     |
| S489A             | 60                     |
| S491A             | 46                     |
| S554R             | 54                     |

**S6 Table. Melting temperatures of ChID MIDAS Mutants.** The thermal stabilities of all of the mutants are comparable to WT and well above the 34 °C used in assays. This would suggest that instability of the mutants is not the cause of the abolished or greatly reduced chelatase activity.

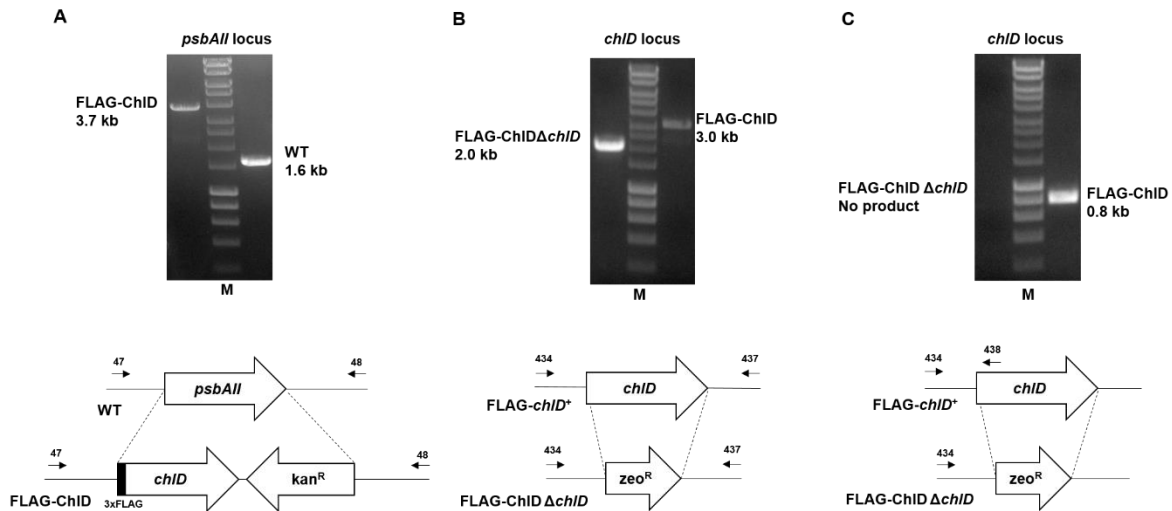

**S1 Fig. Generation of *Synechocystis* strains used in this study.** **A** Integration of gene encoding 3×FLAG-tagged ChID at the *psbAII* (slr1311) locus in strain FLAG-ChID. Agarose gel analysis with primers flanking the integration site shows that a single larger PCR product is amplified from the FLAG-ChID genomic (g)DNA compared to that from the wildtype (WT) due to insertion of the tagged gene and the kanamycin resistance cassette (*kan<sup>R</sup>*) in place of *psbII*. **B-C** Deletion of the native *chID* (slr1777) gene in strain FLAG-ChID  $\Delta chID$ . **B** Agarose gel analysis with primers flanking the deletion site shows that a smaller PCR product is amplified from FLAG-ChID  $\Delta chID$  gDNA compared to FLAG-ChID gDNA due to replacement of the *chID* gene with the smaller zeocin resistance cassette (*zeo<sup>R</sup>*). **C** To confirm that the FLAG-ChID  $\Delta chID$  has fully segregated at the *chID* locus PCR with a reverse primer internal to the deleted portion of the gene was performed. A product is present using FLAG-ChID gDNA as template but absent when using gDNA from the FLAG-ChID  $\Delta chID$  strain. In all panels the position of primers used in the PCR analysis are indicated with small black arrows and lane M contains Hyperladder™ I (Bioline, UK).

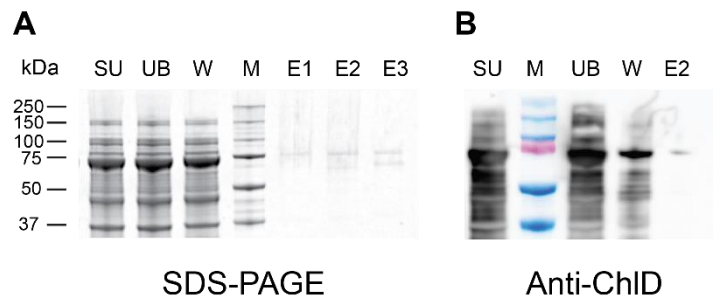

**S2 Fig: Non-tagged ChID does not purify on a StrepTrap column.** (A) *Synechocystis* non-tagged ChID was applied to a StrepTrap HP column. Lanes: SU, cell supernatant; UB, unbound fraction; M, molecular weight markers as indicated on right hand side; W, Binding buffer wash, Elutions (E1 – 3): Binding buffer with 2.5 mM biotin. (B) Western blot analysis of StrepII-ChIH and non-tagged ChID fractions from A, showing the presence of ChID in both the supernatant, unbound and wash fraction, but only a comparatively small amount in the elution fraction.



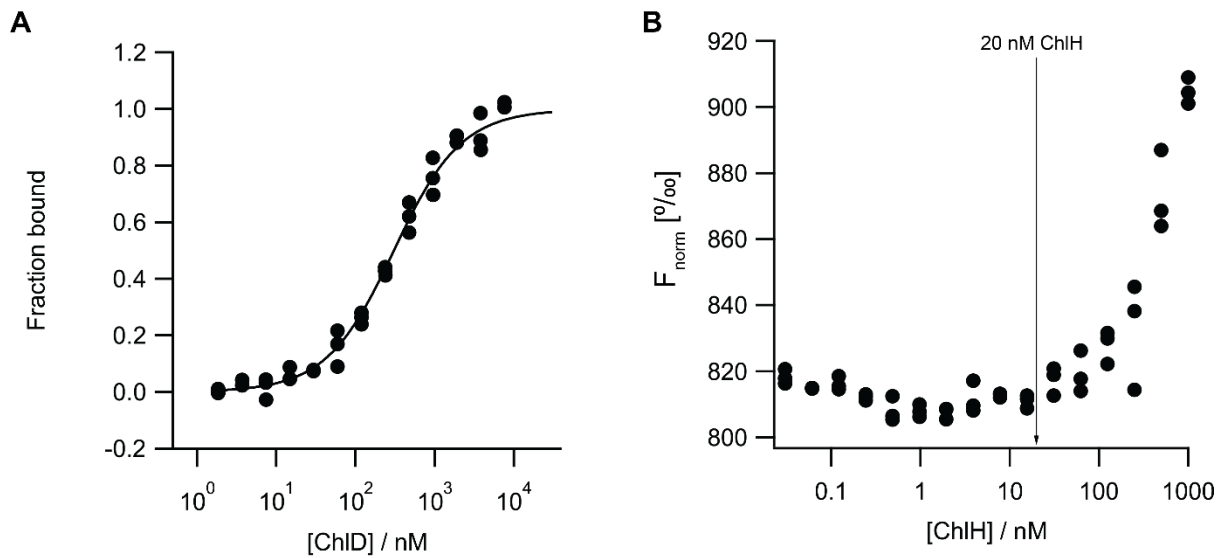

**S3 Fig. Monitoring self assembly of (A) ChID and (B) ChIH.** Proteins were labelled with NHS-NT-647 and MST was conducted. (A) A single site binding model fits the data, resulting in a  $K_d = 296$  nM, suggesting that ChID may be binding to ChIH as a dimer. (B) As indicated by the arrow, there is no observed interaction of ChIH with itself at the concentrations used in ChID titrations (20 nM). It does seem that ChIH will dimerise at higher concentrations, however. Thermophoresis was performed where each chelatase subunit was titrated into 20 nM labeled of the same subunit in 50 mM Tris/NaOH, 10mM  $Mg^{2+}$  0.2% Pluronic-F127, pH 7.8.

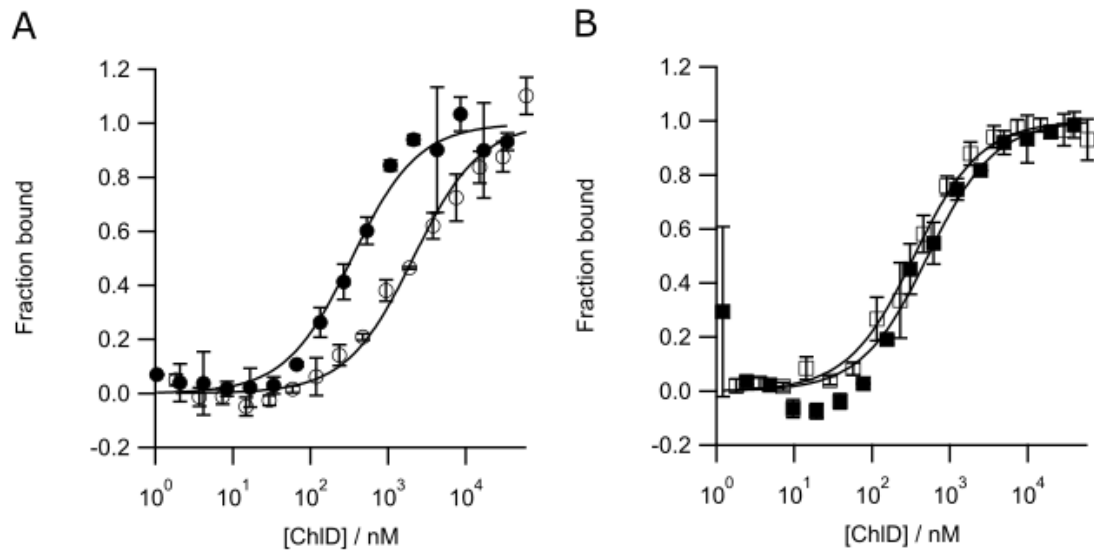

**S4 Fig. The Quintuple mutant (QuinE) of ChID does not have a Mg<sup>2+</sup> dependent  $K_d$  for ChIH.** Unlike WT ChID, the interaction between ChIH and the non-cooperative QuinE mutant of ChID is not dependent on Mg<sup>2+</sup>. MST traces of WT (A) and QuinE (B) in the presence and absence of Mg<sup>2+</sup> (filled and unfilled symbols respectively). The fitted curves reveal a  $K_d$  of  $338.5 \pm 39.7$  nM and  $512.5 \pm 161.31$  nM for the QuinE mutant in the presence and absence of Mg<sup>2+</sup>, respectively.

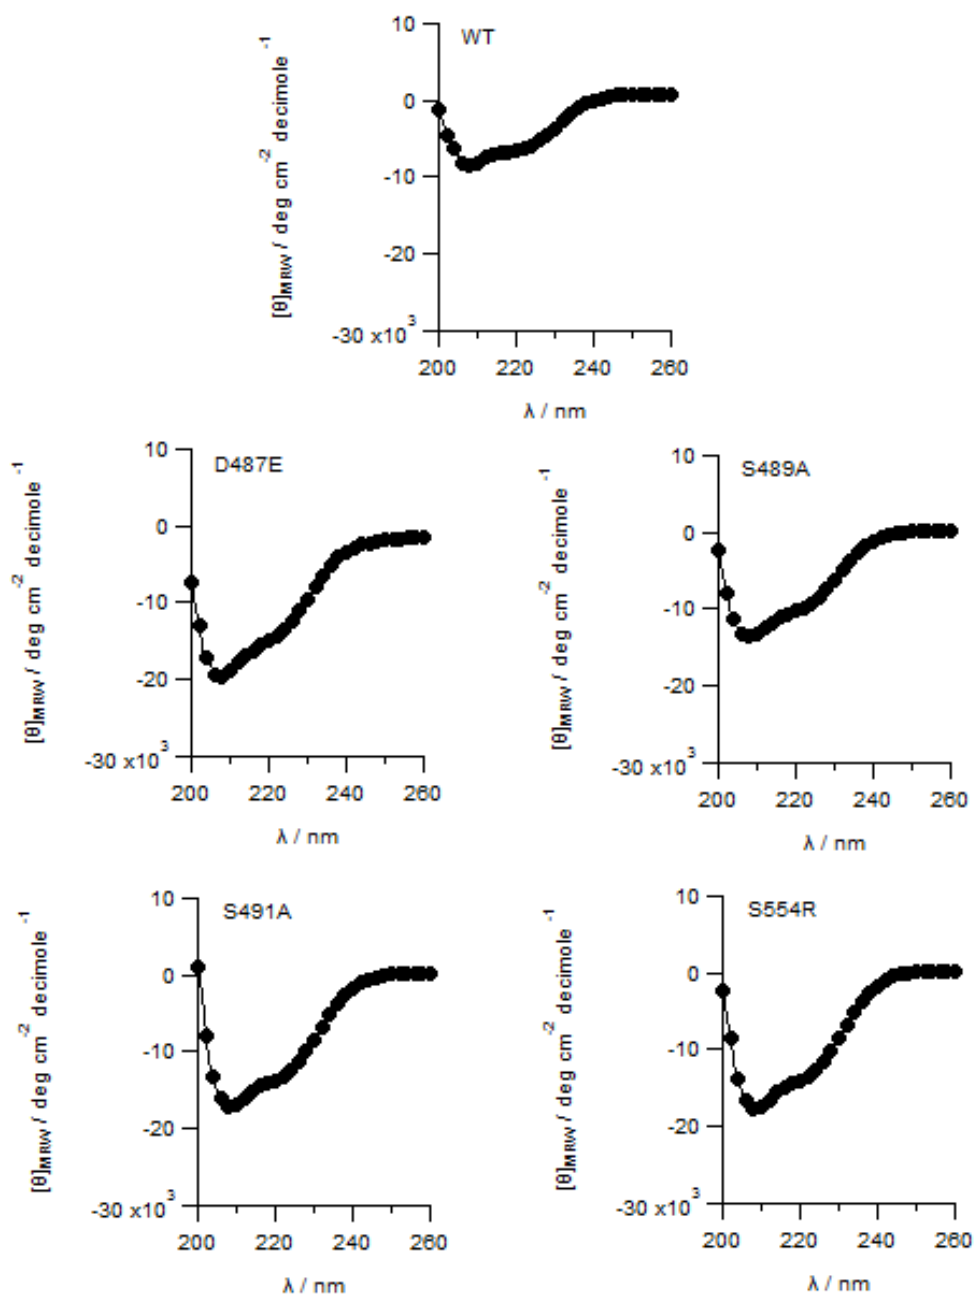

**S5 Fig. CD spectra of the ChID MIDAS mutants.** All four mutants have a broadly similar CD spectra to the WT, suggesting that secondary structure of these mutants has not been disrupted. Spectra were recorded with a JASCO-810 spectrometer (JASCO, Great Dunmow, UK). Protein ( $0.05 \text{ mg ml}^{-1}$ ) was in a 5 mM sodium phosphate buffer, 1 mM  $\beta$ -mercaptoethanol, pH 7.5. Spectra were recorded from 260 to 200 nm (1 nm steps, 4 s/nm, 4 accumulations) and background subtracted.

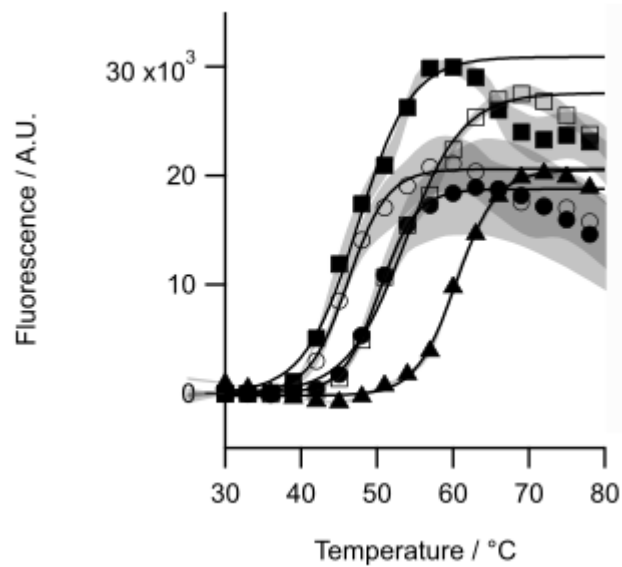

**S6 Fig. Temperature stability of MIDAS mutants.** All mutants (D487E, filled square; S489A, filled triangle; S491A, open circle; S554R, open square) have a thermal stability comparable or above WT (filled circles), with all calculated  $T_m$  values greater than the activity assay temperature of 34 °C.  $T_m$  values are shown in Table S4. Assay contained 5  $\mu$ M ChID, 10 mM  $MgCl_2$ , 1x SYPRO Orange and 1x thermal shift buffer. Temperature ramp rate was 1 °C per cycle per minute. Fluorescence was read at each temperature. Every 3 values are shown for clarity, and can be described by equation 3 to calculate  $T_m$  values.

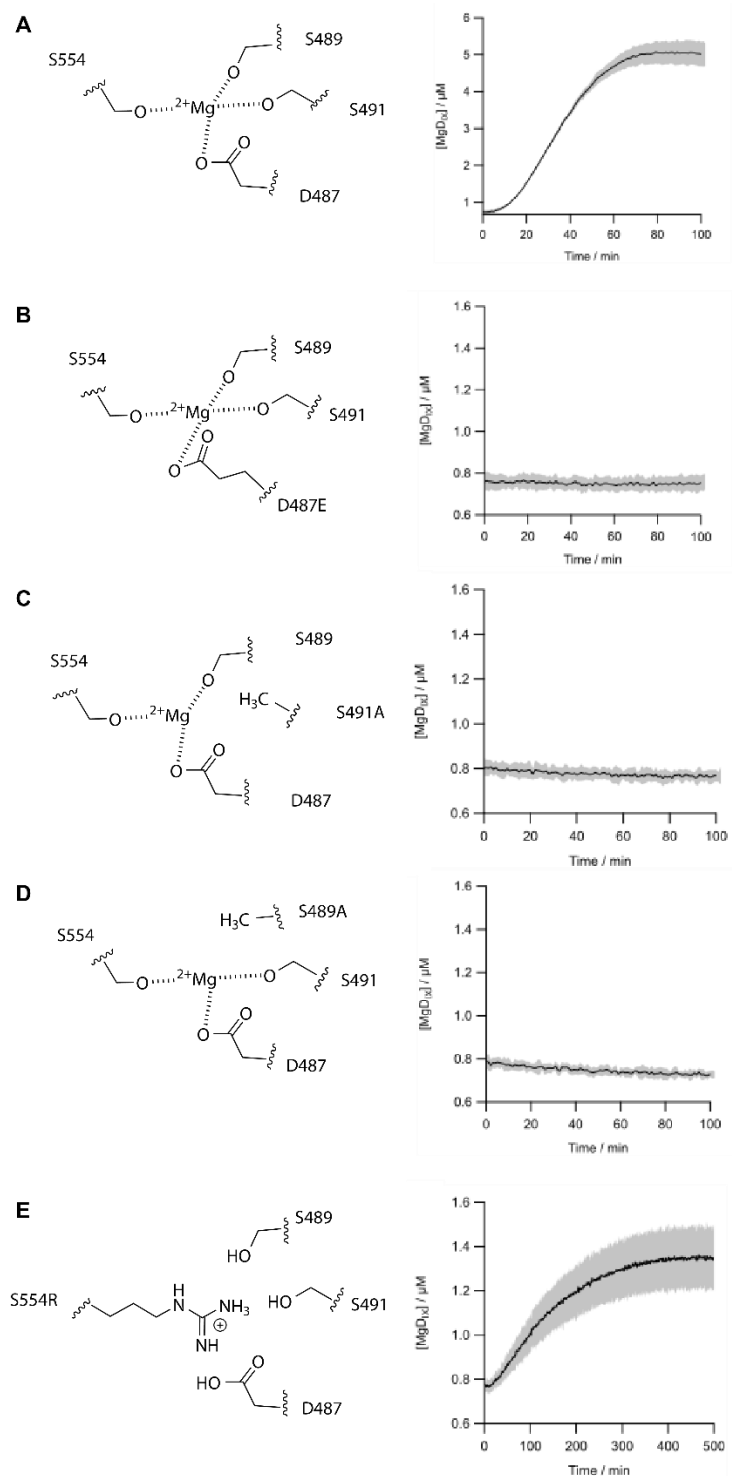

**S7 Fig. Activity assays of ChID MIDAS mutants.** Schematic representation of mutant and subsequent chelatase activity of A, WT; B, D487E; C, S491A; D, S489A; and E, S554R. Assays performed under the same conditions as Fig. 3. Of the mutants, only ChID S554R (open circles) showed any activity, although this was severely impaired when compared to WT ( $k_{rel} = 5\%$  c.f. WT ChID).
